# Supplementary material for: Highly efficient and regioselective enzymatic synthesis of β-(1→3) galactosides in biosolvents
Source: Royal Society of Chemistry journal article supplement (doi:10.1039/c3ra40860d), 2013-01-01
Supplement: c3ra40860d.pdf [file c3ra40860d.pdf]

## Supporting Information

### Highly efficient and regioselective enzymatic synthesis of $\beta$ -1 $\rightarrow$ 3 galactosides in biosolvents

Carlos Bayón<sup>a</sup>, Álvaro Cortés<sup>b</sup>, Antonio Aires-Trapote<sup>a</sup>, Concepción Civera<sup>c</sup>, and María José Hernáiz<sup>a,\*</sup>

<sup>a</sup> Department of Organic and Pharmaceutical Chemistry, Faculty of Pharmacy, Complutense University of Madrid, Campus de Moncloa, 28040 Madrid, Spain.

<sup>b</sup> Unidad de Bioinformática. Centro de Biología Molecular "Severo Ochoa" (CBMSO), CSIC, Autónoma University of Madrid (UAM), C/ Nicolás Cabrera 1, 28049, Madrid, Spain.

<sup>c</sup> Department of Physics and Chemistry, Faculty of Pharmacy, Complutense University of Madrid, Campus de Moncloa, 28040 Madrid, Spain.

\*Tel: (+) 34 91139 41821; Fax: (+) 34 9139 41822;

E-mail: [mjhernai@ucm.es](mailto:mjhernai@ucm.es)

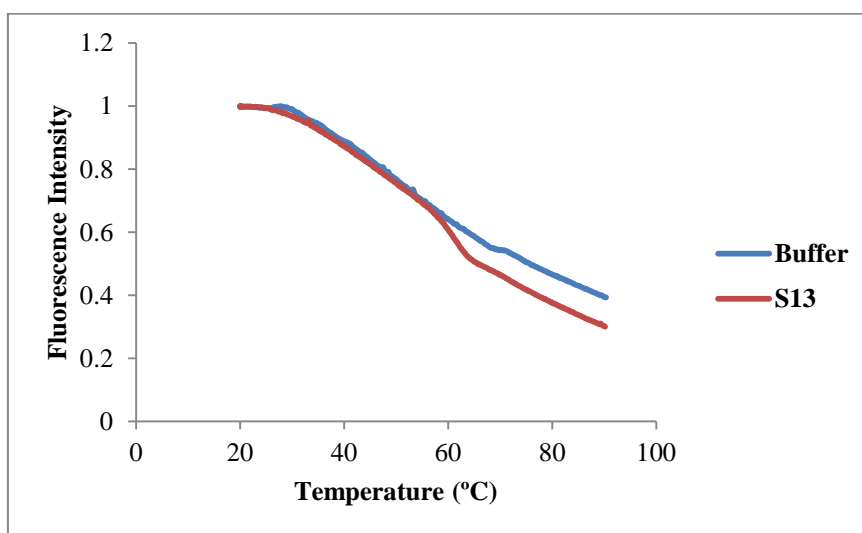

Fig. S1. Thermal denaturation by fluorescence acquired at 295nm excitation and 330 nm wavelength emission
